# Supplementary material
Source: MDPI journal article supplement (https://www.mdpi.com/2073-4352/14/1/68)
Supplement: s1 [file s1]

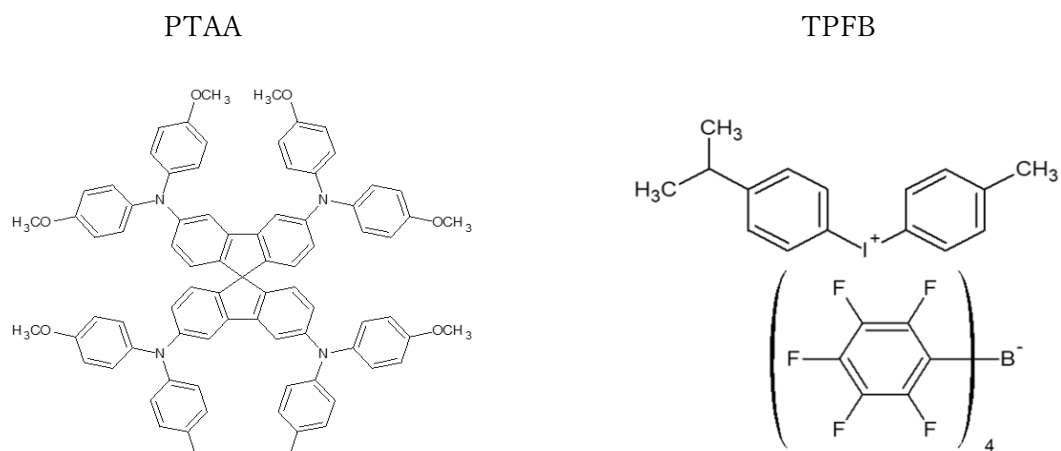

(a)

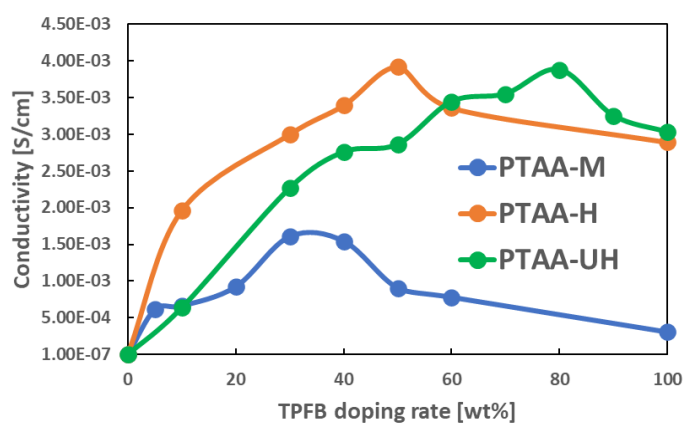

(b)

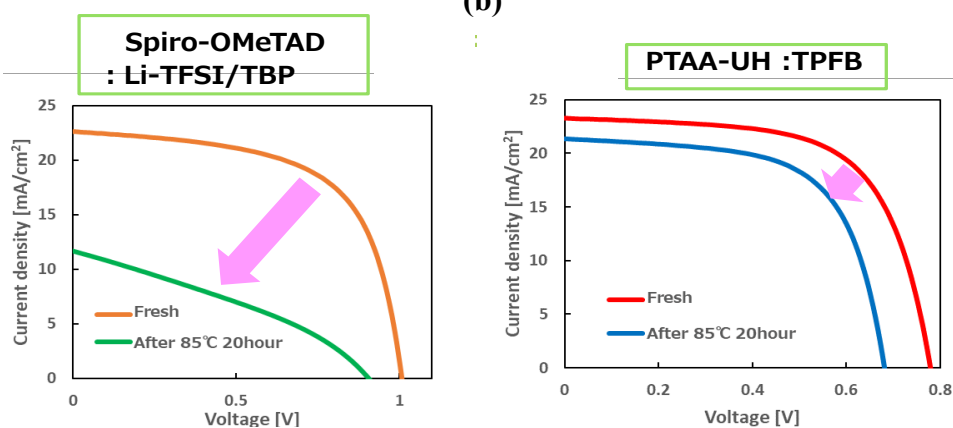

(c)

**Figure S1.** (a) Molecular structure of PTAA and TPFB (b) Conductivity of PTAA as a function of TPFB mixing concentration. -M, -U. and -UH present molecular weight, M: 1.1 kDa, H: 90 kDa,

and UH: 325 kDa in PTAA. (c) Stability test of I-V curve of single PSCs with spiro-OMeTAD and PTAA(TPFB) as HTL for 85°C and 85%.

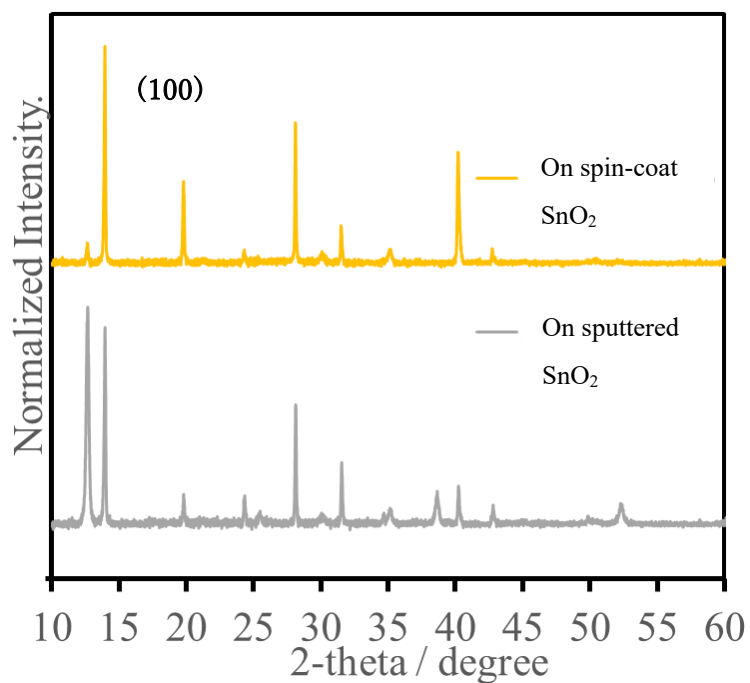

|                               | (100) diffraction peak | fwhm [°] |
|-------------------------------|------------------------|----------|
| On spin coat SnO <sub>2</sub> | 13.96                  | 0.099    |
| On sputtered SnO <sub>2</sub> | 13.97                  | 0.108    |

**Figure S2.** XRD pattern of FA<sub>0.9</sub>CS<sub>0.1</sub>PbI<sub>3</sub> thin films on spin coated and sputtered SnO<sub>2</sub> substrates.

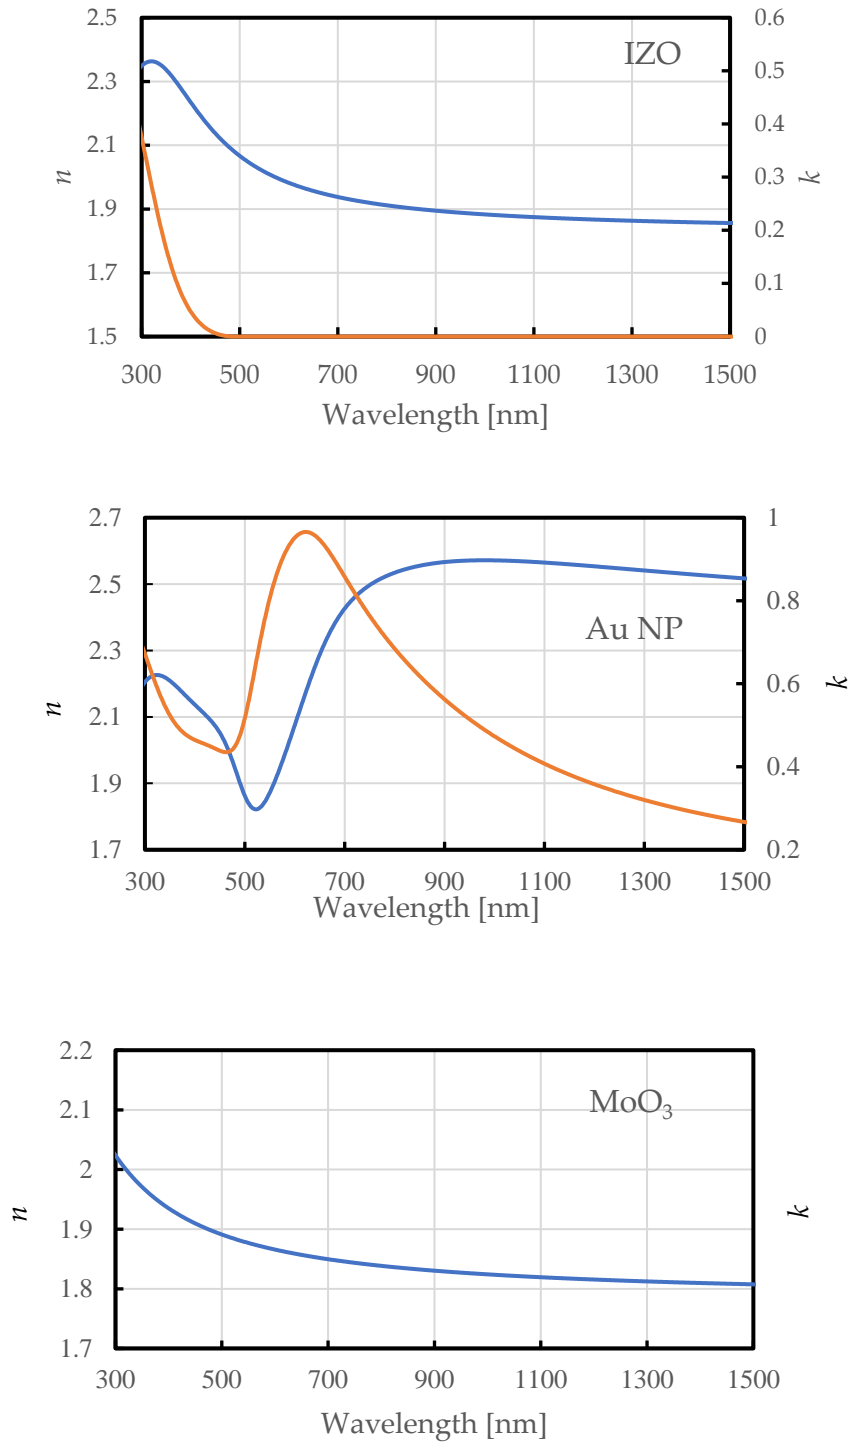

**Figure S3.** The  $n$  and  $k$  spectra of MoO<sub>3</sub>, IZO, Au NPs components for the IZO/MoO<sub>3</sub> bilayer with and without Au NPs determined by the spectra fitting procedure. The  $n$  and  $k$  spectra of Au NP are given in the reference [48-50]. The measured spectra are analyzed using New-amorphous model for IZO and SnO<sub>2</sub>.

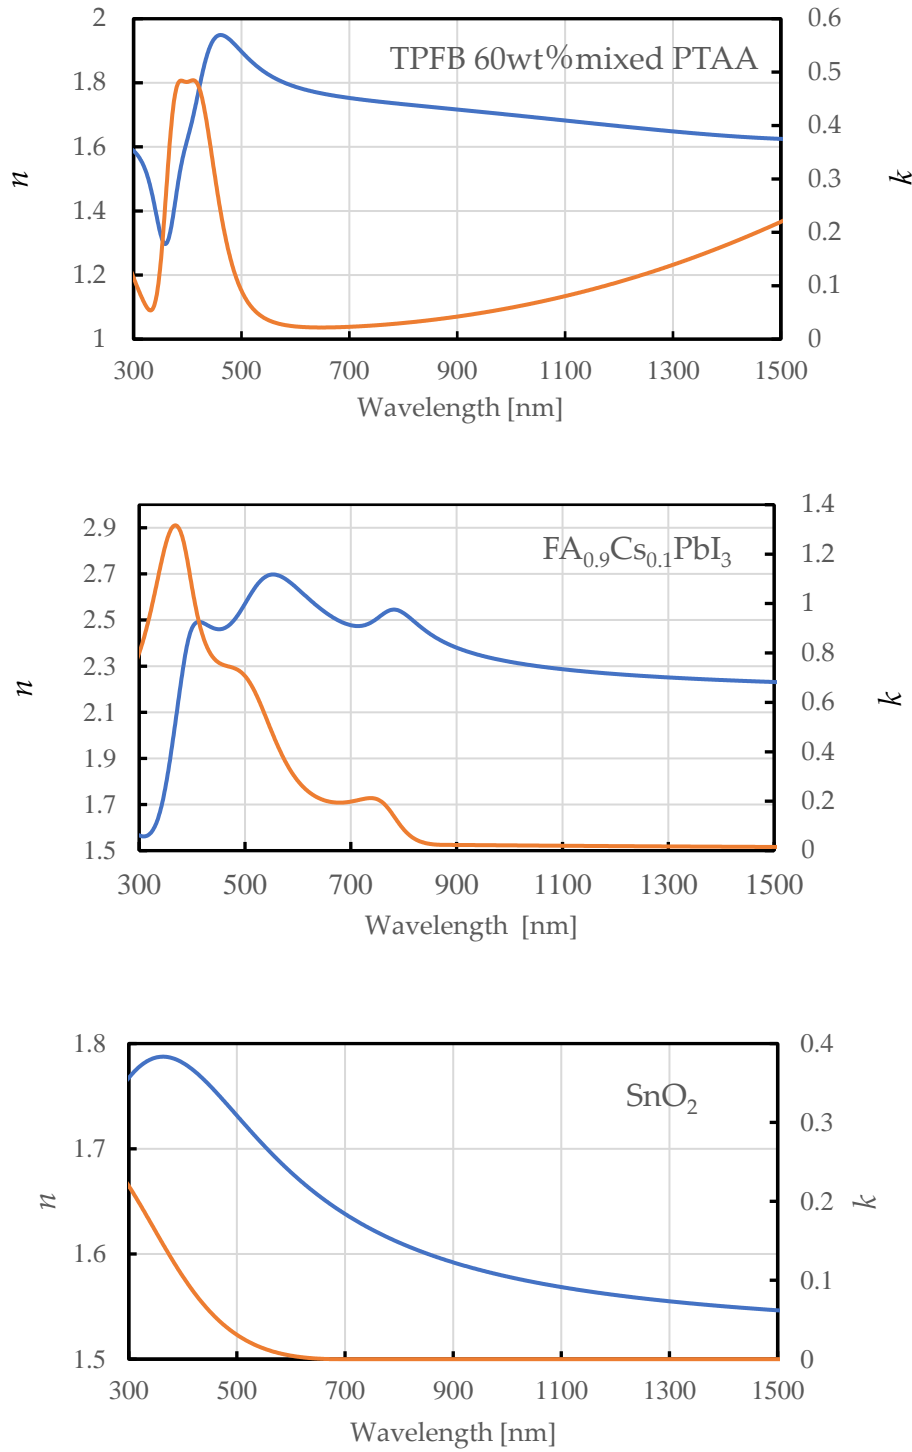

**Figure S4.** The  $n$  and  $k$  spectra of 60 wt% TPFB mixed PTAA, FA<sub>0.9</sub>Cs<sub>0.1</sub>PbI<sub>3</sub>, and SnO<sub>2</sub> determined by the spectra fitting procedure. New amorphous + Drude model for 60% TPFB mixed PTAA, reference +I ZO for Au NPs, New-amorphous + Drude for PEDOT:PSS considering the uniaxial optical anisotropy.
